# Supplementary material for: Potential of Gut Microbe-Derived Extracellular Vesicles to Differentiate Inflammatory Bowel Disease Patients from Healthy Controls
Source: PubMed Central journal article supplement — Gut Liver. 2022 Nov 25;17(1):108–18. doi: 10.5009/gnl220081 (PMC9840915; doi:10.5009/gnl220081), 2022-11-25
Supplement: gnl-17-1-108-supple.pdf [file gnl-17-1-108-supple.pdf]

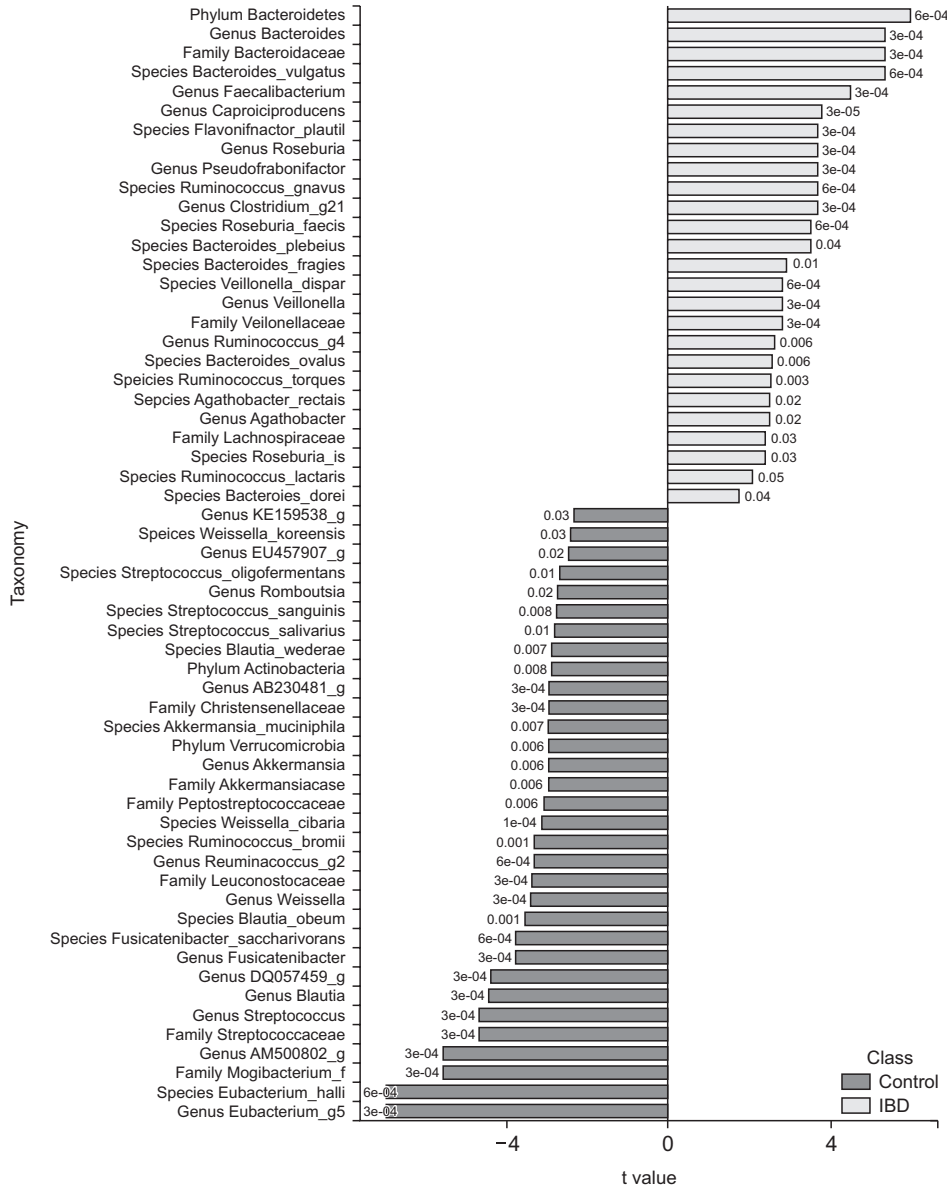

**Supplementary Fig. 1.** T-values of taxa that showed a significant difference in the abundance between healthy controls and patients with inflammatory bowel disease (IBD) in the stool microbiome. Each color indicates which group has more taxa abundance. Each label shows the false discovery rate-adjusted p-value.

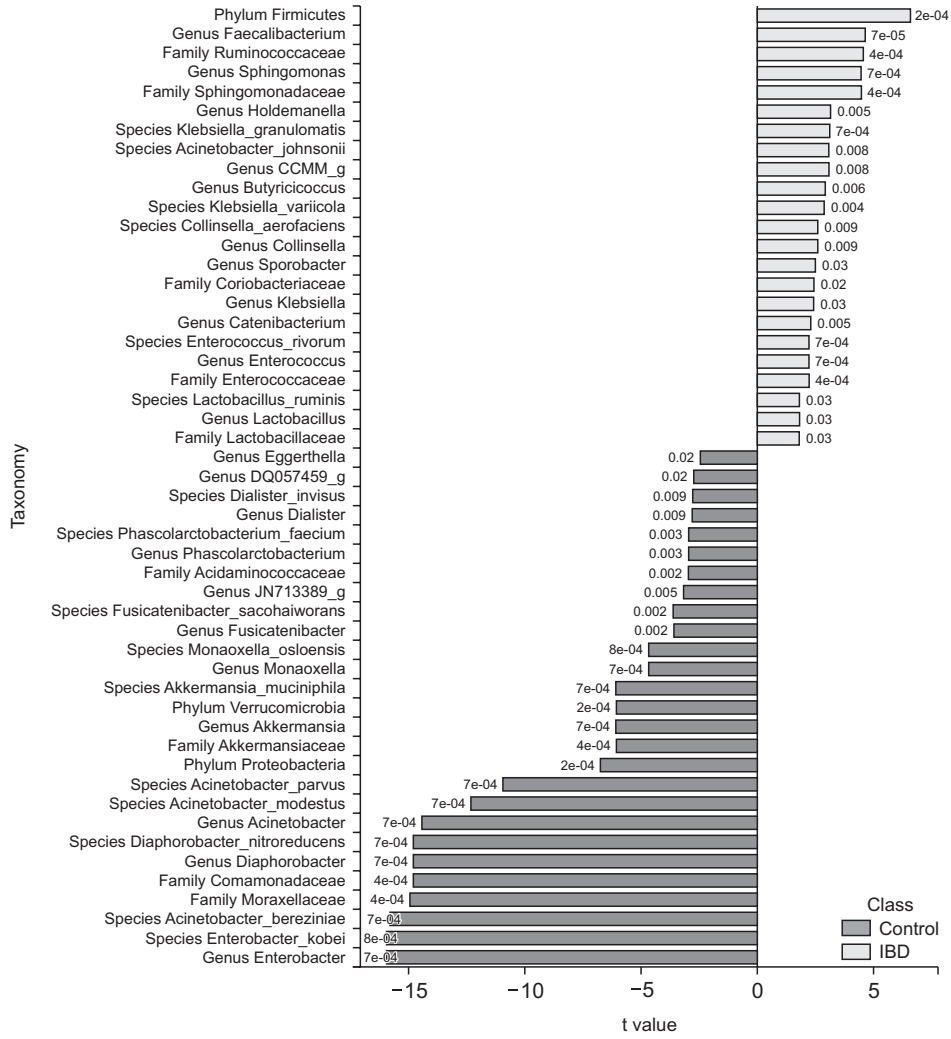

**Supplementary Fig. 2.** T-values of taxa that show a significant difference in the abundance between healthy controls and patients with inflammatory bowel disease (IBD) in gut microbe-derived extracellular vesicles. Each color indicates which group has more taxa abundance. Each label shows the false discovery rate-adjusted p-value.

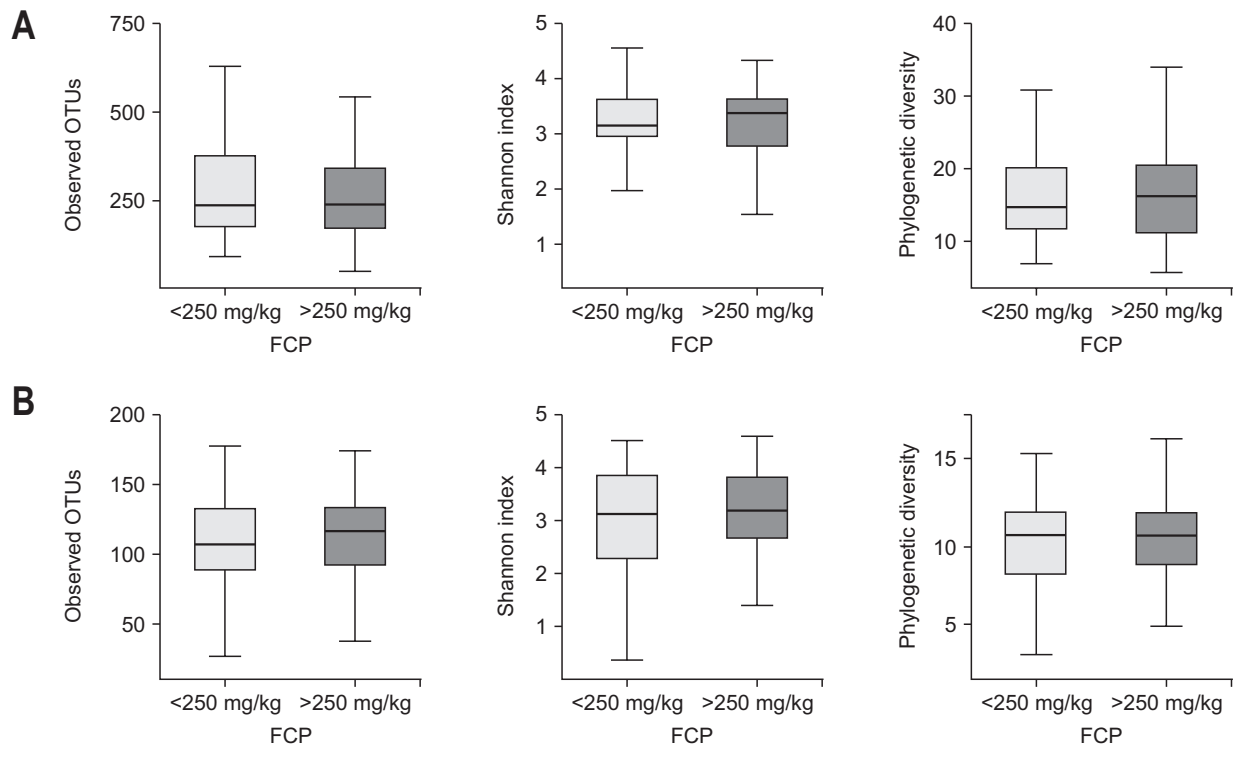

**Supplementary Fig. 3** Alpha diversity of the stool microbiome (A), and gut microbe-derived extracellular vesicles (B), according to disease activity in patients with inflammatory bowel disease. FCP, fecal calprotectin; OTUs, operational taxonomic units.

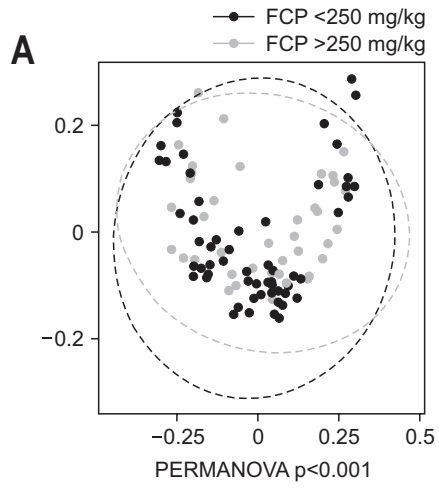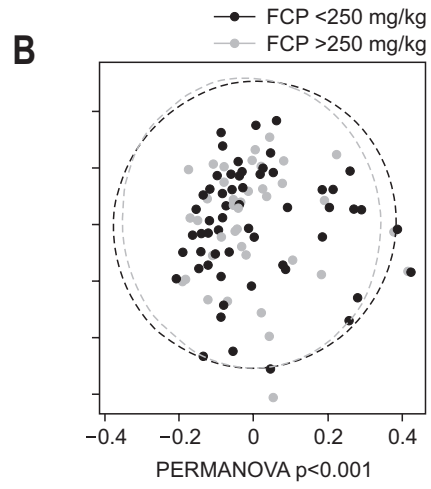

**Supplementary Fig. 4** Principal coordinate analysis of the stool microbiome (A) and gut microbe-derived extracellular vesicles (B) according to disease activity in patients with inflammatory bowel disease. FCP, fecal calprotectin; PERMANOVA, permutational analysis of variance.

**Supplementary Table 1.** Baseline Characteristics of the Study Participants

| Variables                                   | IBD<br>(n=110) | Control<br>(n=110) | p-value |
|---------------------------------------------|----------------|--------------------|---------|
| Age, median (range), yr                     | 39 (17–72)     | 38 (20–80)         | 0.859   |
| Male sex                                    | 75 (68.2)      | 28 (25.5)          | <0.001  |
| Current smoking                             | 19 (17.3)      | 0                  | <0.001  |
| Body mass index, mean±SD, kg/m <sup>2</sup> | 23.2±3.2       | 27.6±4.3           | <0.001  |
| Bristol Stool Form Scale                    |                |                    | <0.001  |
| 1–2                                         | 8 (7.3)        | 25 (22.7)          |         |
| 3–5                                         | 73 (66.4)      | 59 (53.6)          |         |
| 6–7                                         | 21 (19.1)      | 26 (23.6)          |         |
| Disease duration, median (IQR), yr          | 2.4 (0–17)     |                    |         |
| UC                                          | 71 (64.6)      |                    |         |
| UC, extent (n=71)                           |                |                    |         |
| UC proctitis                                | 19 (26.8)      |                    |         |
| Left-sided colitis                          | 20 (28.2)      |                    |         |
| Pancolitis                                  | 32 (45.1)      |                    |         |
| CD, age (n=39)                              |                |                    |         |
| A1 (<17 yr)                                 | 3 (7.7)        |                    |         |
| A2 (17–40 yr)                               | 32 (82.1)      |                    |         |
| A3 (>40 yr)                                 | 4 (10.3)       |                    |         |
| CD, location (n=39)                         |                |                    |         |
| L1 (ileum)                                  | 13 (33.3)      |                    |         |
| L2 (colon)                                  | 0              |                    |         |
| L3 (ileocolonic)                            | 26 (66.7)      |                    |         |
| CD, behavior (n=39)                         |                |                    |         |
| B1 (inflammatory)                           | 20 (51.3)      |                    |         |
| B2 (stricturing)                            | 8 (20.5)       |                    |         |
| B3 (penetrating)                            | 11 (28.2)      |                    |         |
| History of abdominal surgery                | 8 (7.3)        |                    |         |
| CRP (>0.5 mg/dL)                            | 22 (20.0)      |                    |         |
| FCP (>250 mg/kg)                            | 46 (43.8)      |                    |         |
| Medication use                              |                |                    |         |
| Steroids                                    | 62 (56.4)      |                    |         |
| Immune modulators                           | 50 (45.5)      |                    |         |
| TNF- $\alpha$ inhibitors                    | 15 (13.6)      |                    |         |

Data are presented as number (%) unless otherwise indicated.

IBD, inflammatory bowel disease; IQR, interquartile range; UC, ulcerative colitis; CD, Crohn's disease; CRP, C-reactive protein; FCP, fecal calprotectin; TNF, tumor necrosis factor.

**Supplementary Table 2.** Taxa Showing a Significant Difference in the Abundance in the Stool Microbiome between Healthy Controls and Patients with Inflammatory Bowel Disease Using Microbiome-Based Methods

| Taxon                                  | FDR-edgeR   | FDR-OMiAT | Beta-TMAT | FDR-TMAT    |
|----------------------------------------|-------------|-----------|-----------|-------------|
| <b>Family</b>                          |             |           |           |             |
| <i>Christensenellaceae</i>             | 1.26E-05    | 0.01008   | -0.26     | 2.41E-06    |
| <i>Leuconostocaceae</i>                | 1.28E-06    | 1.00E-04  | -0.26     | 5.47E-06    |
| <i>Mogibacterium_f</i>                 | 2.03E-09    | 0         | -0.33     | 1.71E-09    |
| <i>Peptostreptococcaceae</i>           | 0.001637759 | 1.00E-04  | -0.19     | 0.001470189 |
| <i>Streptococcaceae</i>                | 0.000155964 | 1.00E-04  | -0.23     | 0.000639829 |
| <b>Genus</b>                           |             |           |           |             |
| <i>AB239481_g</i>                      | 5.23E-05    | 0.02145   | -0.26     | 3.95E-06    |
| <i>AM500802_g</i>                      | 3.70E-08    | 0         | -0.33     | 9.82E-10    |
| <i>Blautia</i>                         | 9.16E-10    | 0.000212  | -0.39     | 3.27E-10    |
| <i>Caproiciproducens</i>               | 4.18E-05    | 0.000367  | 0.17      | 0.004403    |
| <i>DQ057459_g</i>                      | 0.000108    | 0.002406  | -0.20     | 0.00063     |
| <i>Eubacterium_g5</i>                  | 2.28E-07    | 0         | -0.35     | 9.82E-10    |
| <i>Fusicatenibacter</i>                | 8.48E-09    | 0.0055    | -0.36     | 9.82E-10    |
| <i>Pseudoflavonifractor</i>            | 0.002805    | 0.04884   | 0.22      | 7.99E-05    |
| <i>Streptococcus</i>                   | 9.39E-06    | 0.000212  | -0.23     | 0.000932    |
| <i>Weissella</i>                       | 9.16E-10    | 0.000212  | -0.26     | 9.75E-06    |
| <b>Species</b>                         |             |           |           |             |
| <i>Blautia obeum</i>                   | 0.000222    | 0.005658  | -0.28     | 6.41E-06    |
| <i>Blautia wexlerae</i>                | 1.18E-09    | 0.005889  | -0.31     | 1.03E-06    |
| <i>Eubacterium hallii</i>              | 4.38E-07    | 0         | -0.36     | 3.36E-09    |
| <i>Flavonifractor plautii</i>          | 0.014653    | 0.013227  | 0.26      | 1.68E-05    |
| <i>Fusicatenibacter saccharivorans</i> | 4.43E-07    | 0.013496  | -0.38     | 1.64E-09    |
| <i>Ruminococcus bromii</i>             | 0.000131    | 0.001078  | -0.34     | 2.72E-08    |
| <i>Ruminococcus gnavus</i>             | 0.047261    | 0.013227  | 0.19      | 0.001886    |
| <i>Streptococcus salivarius</i>        | 1.42E-07    | 0.018681  | -0.22     | 0.000719    |
| <i>Weissella cibaria</i>               | 4.61E-12    | 0.013227  | -0.33     | 9.37E-09    |

FDR, false discovery rate; edgeR, R Bioconductor package for the differential analysis of sequence read count data; OMiAT, optimal microbiome-based association test; TMAT, phylogenetic-tree-based microbiome association test. In the beta-TMAT column, negative numbers represent decreased abundance in patients with inflammatory bowel disease compared with healthy controls.

**Supplementary Table 3.** Taxa Showing a Significant Difference in the Abundance in Gut Microbe-Derived Extracellular Vesicles between Patients with Inflammatory Bowel Disease and Healthy Controls Using Microbiome-Based Methods

| Taxon                               | FDR-edgeR   | FDR-OMiAT | Beta-TMAT | FDR-TMAT    |
|-------------------------------------|-------------|-----------|-----------|-------------|
| Family                              |             |           |           |             |
| <i>Acidaminococcaceae</i>           | 0.000127199 | 0.034928  | -0.23     | 2.49E-05    |
| <i>Akkermansiaceae</i>              | 0.000880305 | 0         | -0.27     | 1.24E-06    |
| <i>Comamonadaceae</i>               | 2.22E-48    | 0         | -0.42     | 0           |
| <i>Sphingomonadaceae</i>            | 7.48E-11    | 0.005     | 0.20      | 0.000267379 |
| Genus                               |             |           |           |             |
| <i>Akkermansia</i>                  | 6.68E-06    | 0         | -0.27     | 2.47E-06    |
| <i>Diaphorobacter</i>               | 5.50E-48    | 0         | -0.42     | 0           |
| <i>Enterobacter</i>                 | 4.50E-76    | 0         | -0.40     | 0           |
| <i>Klebsiella</i>                   | 0.008275    | 0.001667  | 0.23      | 0.000312    |
| <i>Moraxella</i>                    | 0.003594    | 0         | -0.22     | 0.000191    |
| <i>Sphingomonas</i>                 | 1.46E-09    | 0.012     | 0.20      | 0.000486    |
| Species                             |             |           |           |             |
| <i>Acinetobacter bereziniae</i>     | 2.55E-70    | 0         | -0.40     | 0           |
| <i>Acinetobacter modestus</i>       | 1.24E-49    | 0         | -0.40     | 2.66E-14    |
| <i>Acinetobacter parvus</i>         | 5.12E-14    | 0         | -0.36     | 1.17E-11    |
| <i>Akkermansia muciniphila</i>      | 1.36E-06    | 0         | -0.27     | 1.87E-06    |
| <i>Diaphorobacter nitroreducens</i> | 7.74E-48    | 0         | -0.42     | 0           |
| <i>Enterobacter kobei</i>           | 5.94E-85    | 0         | -0.41     | 0           |
| <i>Moraxella osloensis</i>          | 0.00343     | 0.001111  | -0.22     | 0.000329    |

FDR, false discovery rate; edgeR, R Bioconductor package for the differential analysis of sequence read count data; OMiAT, optimal microbiome-based association test; TMAT, phylogenetic-tree-based microbiome association test. In the beta-TMAT column, negative numbers represent decreased abundance in patients with inflammatory bowel disease compared with healthy controls.

**Supplementary Table 4.** Taxa Showing a Significant Different in the Abundance between Enterotype 1 and Enterotype 2 in Gut Microbe-Derived Extracellular Vesicles of Patients with Inflammatory Bowel Disease Using Microbiome-Based Methods

| Taxon                 | FDR-edgeR | FDR-OMiAT | Beta-TMAT | FDR-TMAT |
|-----------------------|-----------|-----------|-----------|----------|
| Family                |           |           |           |          |
| <i>Prevotellaceae</i> | 5.91E-16  | 0.0012    | 0.92      | 7.43E-08 |
| Genus                 |           |           |           |          |
| <i>Prevotella</i>     | 1.90E-15  | 0.0024    | 0.92      | 1.49E-07 |

FDR, false discovery rate; edgeR, R Bioconductor package for the differential analysis of sequence read count data; OMiAT, optimal microbiome-based association test; TMAT, phylogenetic-tree-based microbiome association test. In the beta-TMAT column, negative numbers represent decreased abundance in enterotype 2 compared with enterotype 1.
